# Supplementary material for: Easy preparation of small crystalline Pd2Sn nanoparticles in solution at room temperature
Source: Royal Society of Chemistry journal article supplement (doi:10.1039/d2dt03476j), 2023-01-01
Supplement: d2dt03476j1.pdf [file d2dt03476j1.pdf]

## Supporting information

### **Easy preparation of small crystalline Pd<sub>2</sub>Sn nanoparticles in solution at room temperature**

*Vincent Dardun,<sup>a</sup> Tania Pinto,<sup>a</sup> Loïc Benaillon,<sup>a</sup> Laurent Veyre,<sup>a</sup> Jules Galipaud,<sup>b,c</sup> Clément Camp,<sup>a</sup> Valérie Meille,<sup>\*d</sup> and Chloé Thieuleux<sup>\*a</sup>*

<sup>a</sup> Université de Lyon, Institut de Chimie de Lyon, Laboratory of Catalysis, Polymerization, Processes & Materials, CP2M UMR 5128 CNRS-UCB Lyon 1-CPE Lyon, CPE Lyon 43 Bd du 11 Novembre 1918, F-69616 Villeurbanne, France

<sup>b</sup> Université de Lyon, Ecole Centrale de Lyon, Laboratory of Tribology and System Dynamics, LTDS UMR CNRS 5513, 36 avenue Guy de Collongues, 69134 Ecully Cedex, France

<sup>c</sup> Université de Lyon, INSA-Lyon, UCBL, MATEIS UMR CNRS 5510, Villeurbanne, France

<sup>d</sup> Université de Lyon, Université Claude Bernard Lyon 1, CNRS, IRCELYON, F-69626, Villeurbanne, France

#### ORCID

Vincent Dardun: 0000-0001-8540-2647

Jules Galipaud : 0000-0002-9952-6162

Clément Camp: 0000-0001-8528-0731

Valérie Meille: 0000-0003-2258-9656

Chloé Thieuleux: 0000-0002-5436-2467

## Table of contents

|                                                             |     |
|-------------------------------------------------------------|-----|
| Supporting information .....                                | S1  |
| Characterization of the Pd and Pd <sub>2</sub> Sn NPs ..... | S3  |
| <i>Transmission Electron Microscopy (TEM)</i> .....         | S3  |
| <i>XPS</i> .....                                            | S11 |
| Catalytic Study .....                                       | S11 |
| <i>NMR study</i> .....                                      | S11 |
| <i>Chromatogram</i> .....                                   | S12 |
| <i>TON and TOF assessment</i> .....                         | S12 |
| <i>Catalytic tests</i> .....                                | S13 |
| References.....                                             | S14 |

## Characterization of the Pd and Pd<sub>2</sub>Sn NPs

### Transmission Electron Microscopy (TEM)

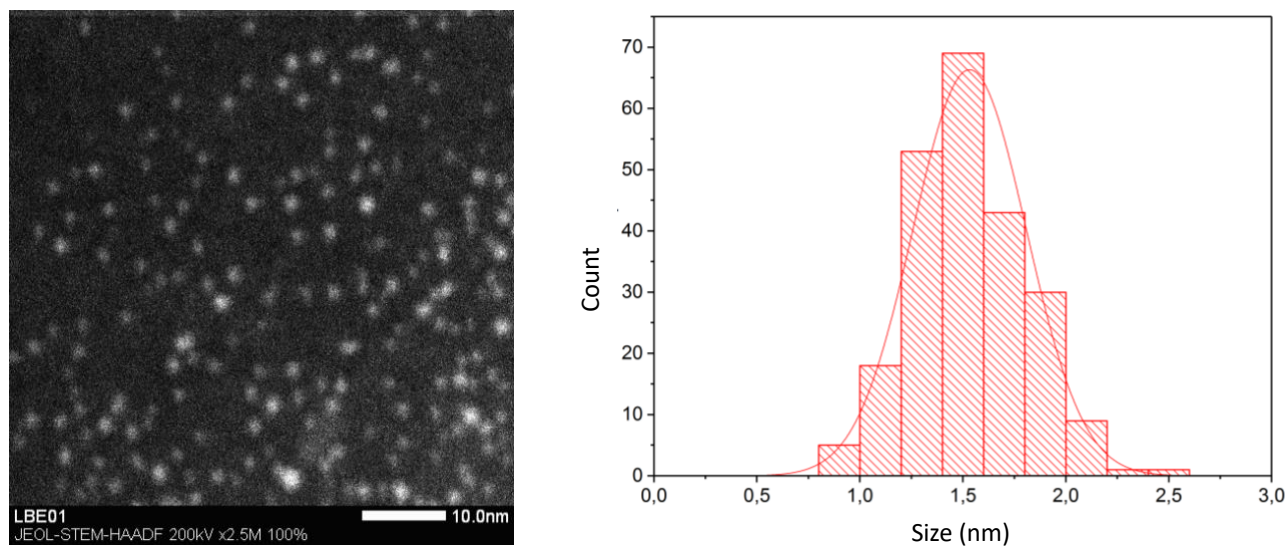

**Figure S1** –Left: STEM-HAADF image (on a copper grid with a carbon lacey) of  $1.5 \pm 0.3$  nm sized palladium nanoparticles synthesized at room temperature with 1.5 equiv. of silane under 4 bars of H<sub>2</sub> in toluene. Right: size distribution of these nanoparticles with the corresponding normal distribution curve.

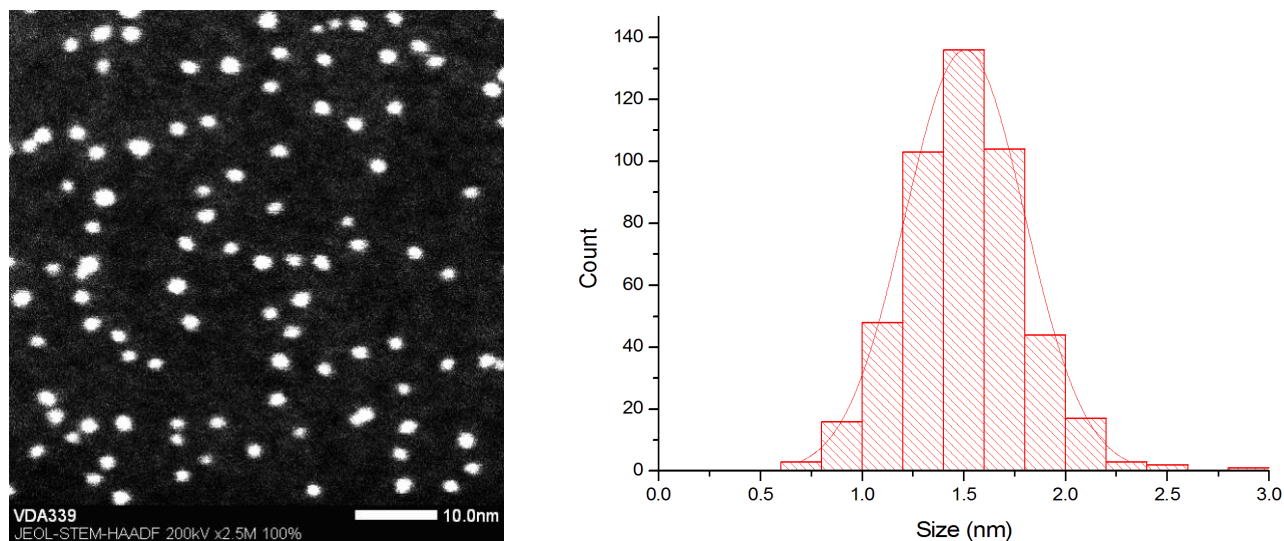

**Figure S2** – Left: STEM-HAADF image (on a copper grid with a carbon lacey) of  $1.5 \pm 0.3$  nm sized palladium nanoparticles synthesized at room temperature with 1.5 equiv. of silane under 4 bars of H<sub>2</sub> in THF. Right: size distribution of these nanoparticles with the corresponding normal distribution curve.

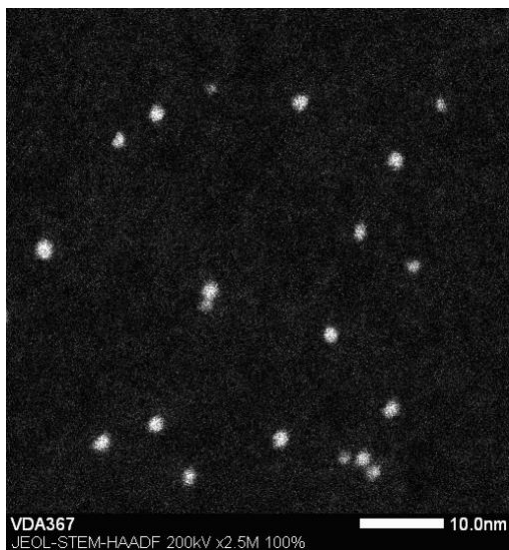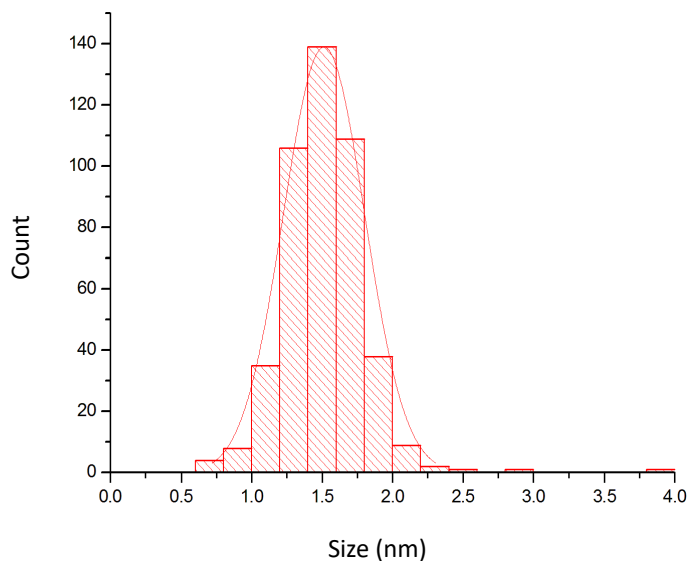

**Figure S3** – Left: STEM-HAADF image (on a copper grid with a carbon lacey) of  $1.5 \pm 0.3$  nm sized palladium nanoparticles synthesized at room temperature with 2 equiv. of silane under 4 bars of  $H_2$  in toluene. Right: size distribution of these nanoparticles with the corresponding normal distribution curve.

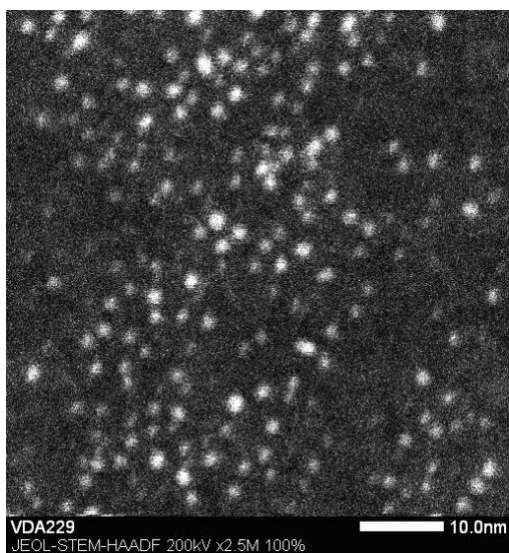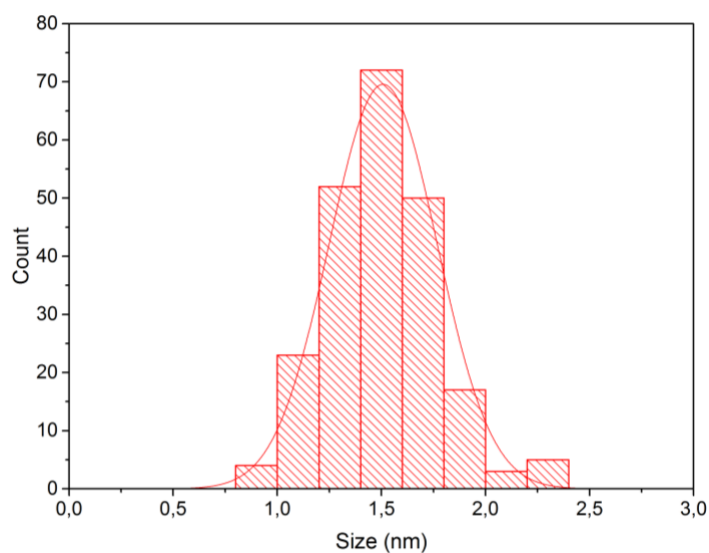

**Figure S4** – Left: STEM-HAADF image (on a copper grid with a carbon lacey) of  $1.5 \pm 0.3$  nm sized palladium-tin nanoparticles synthesized at room temperature with 2 equiv. of tin precursor under 4 bars of  $H_2$  in THF. Right: size distribution of these nanoparticles with the corresponding normal distribution curve.

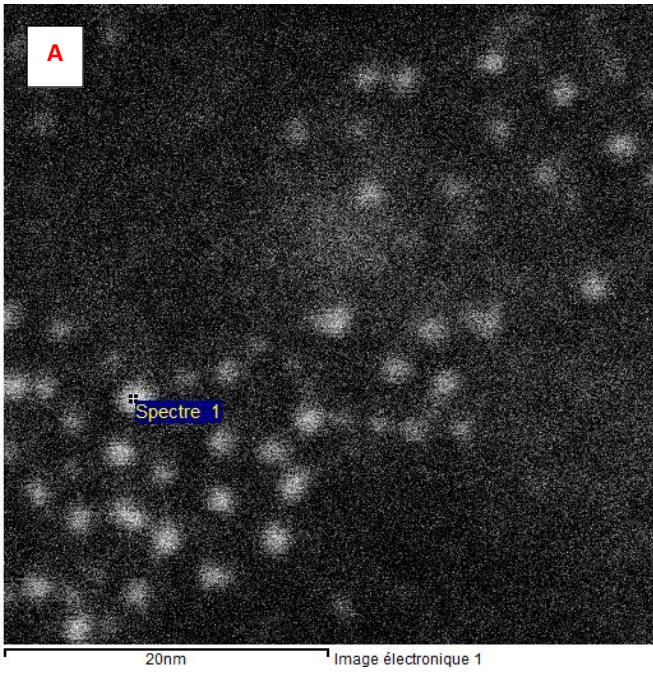

| Element | %Mass  | %Atomic |
|---------|--------|---------|
| Pd L    | 60.82  | 63.39   |
| Sn L    | 39.18  | 36.61   |
| Total   | 100.00 |         |

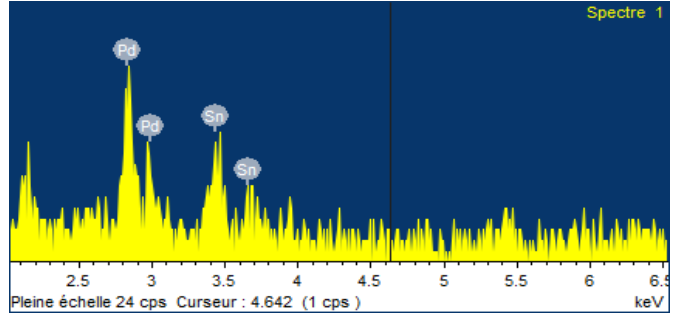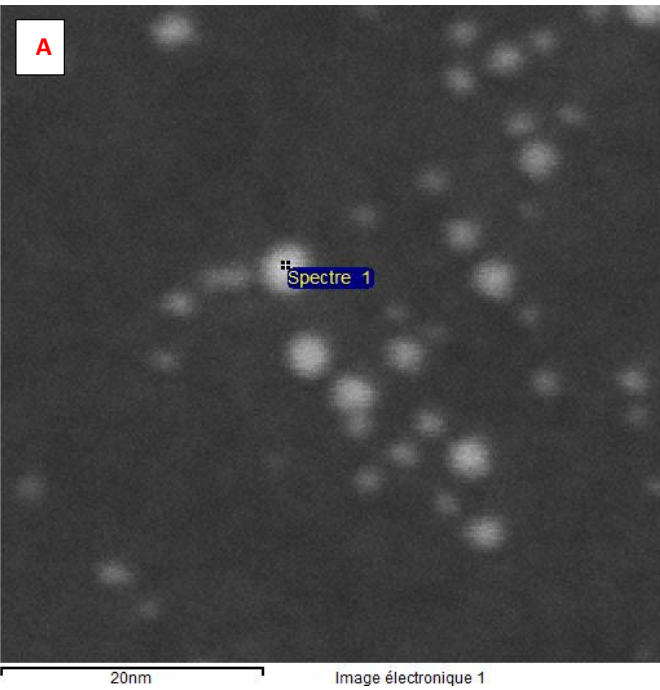

| Element | %Mass  | %Atomic |
|---------|--------|---------|
| Pd L    | 63.67  | 66.16   |
| Sn L    | 36.33  | 33.84   |
| Total   | 100.00 |         |

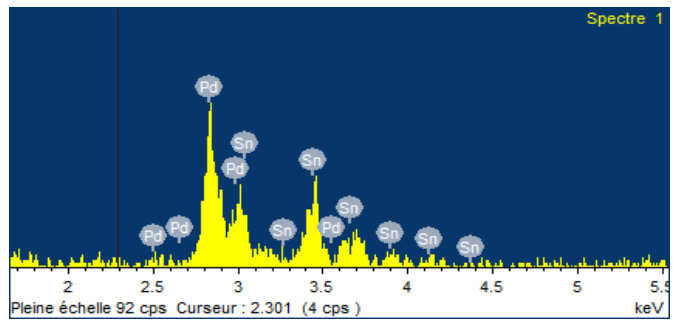

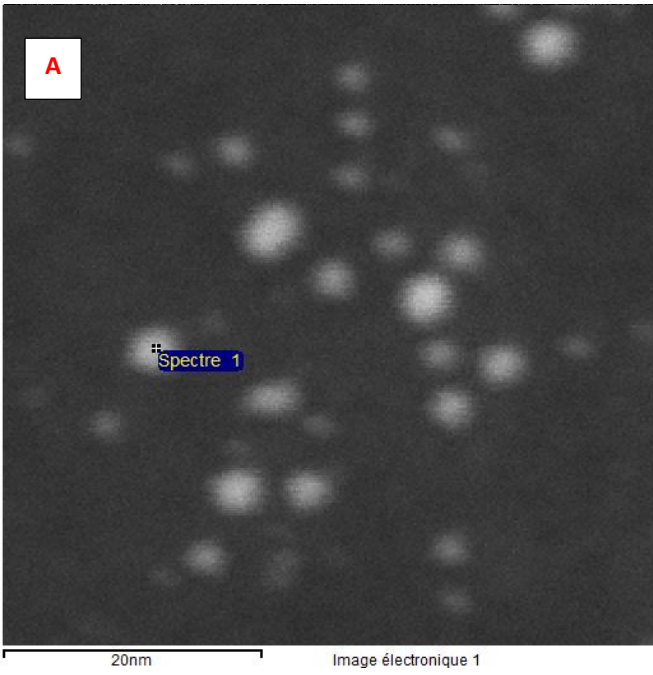

| Element | %Mass  | %Atomic |
|---------|--------|---------|
| Pd L    | 60.69  | 63.27   |
| Sn L    | 39.31  | 36.73   |
| Total   | 100.00 |         |

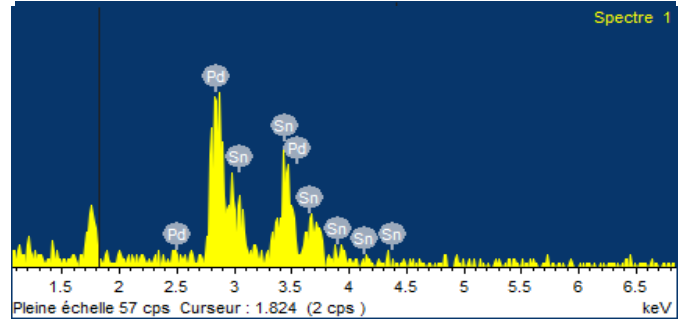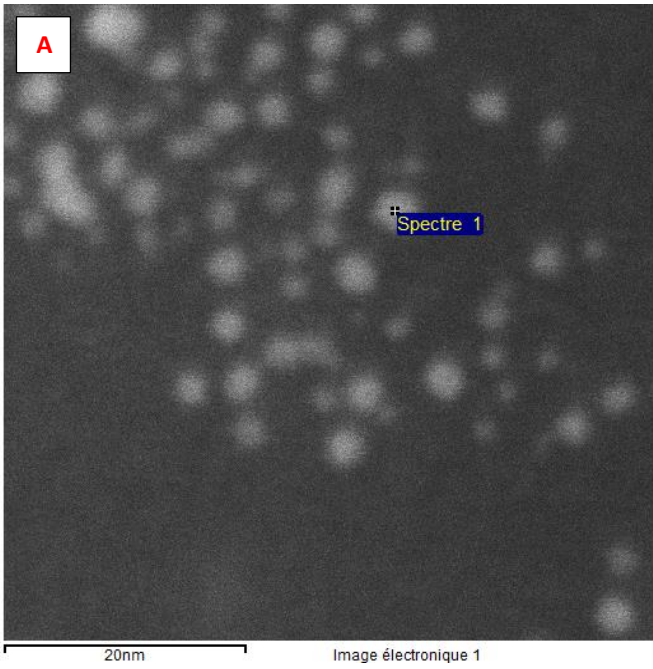

| Element | %Mass  | %Atomic |
|---------|--------|---------|
| Pd L    | 61.13  | 63.69   |
| Sn L    | 38.87  | 36.31   |
| Total   | 100.00 |         |

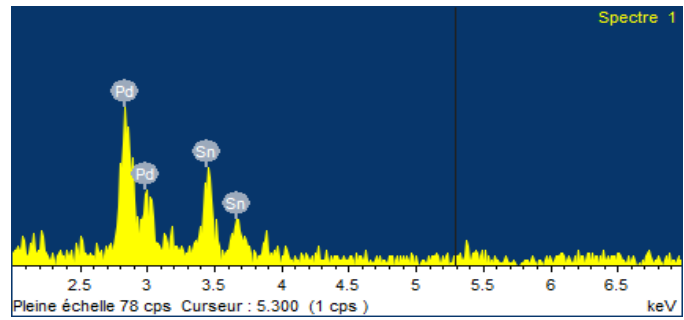

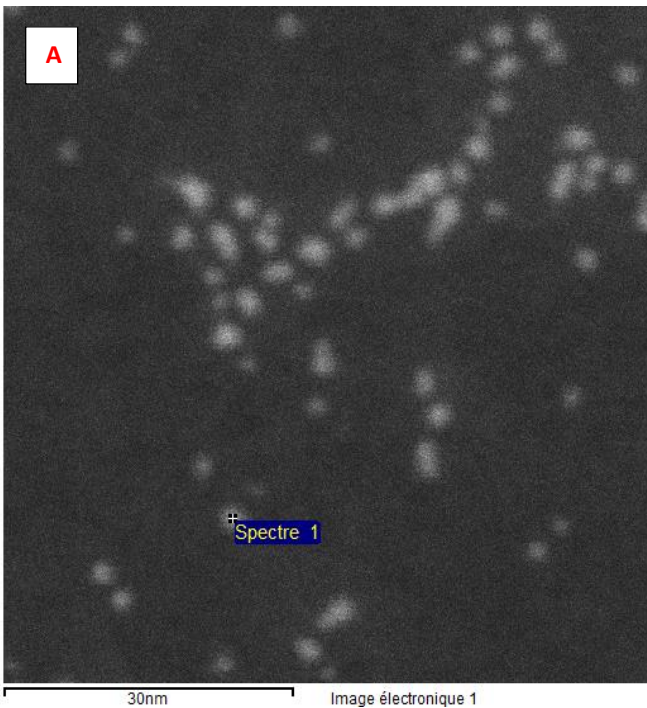

| Element | %Mass  | %Atomic |
|---------|--------|---------|
| Pd L    | 62.85  | 65.37   |
| Sn L    | 37.15  | 34.63   |
| Total   | 100.00 |         |

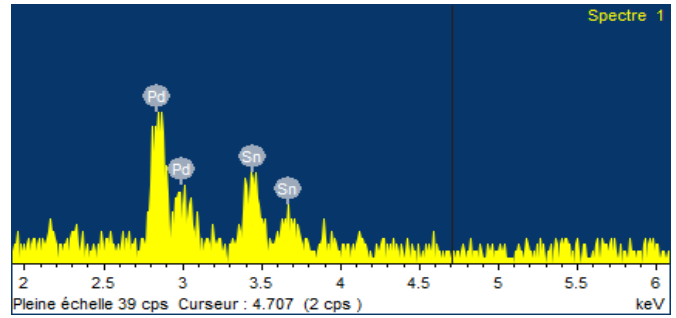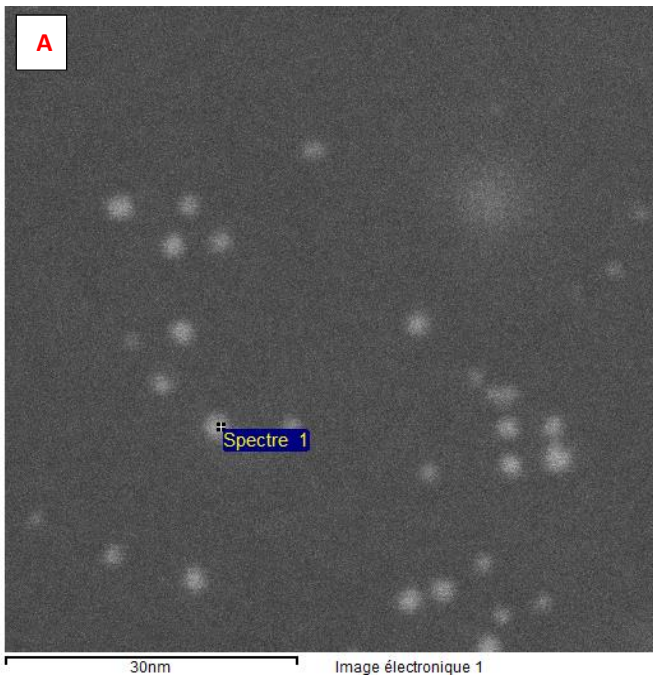

| Element | %Mass  | %Atomic |
|---------|--------|---------|
| Pd L    | 64.22  | 66.69   |
| Sn L    | 35.78  | 33.31   |
| Total   | 100.00 |         |

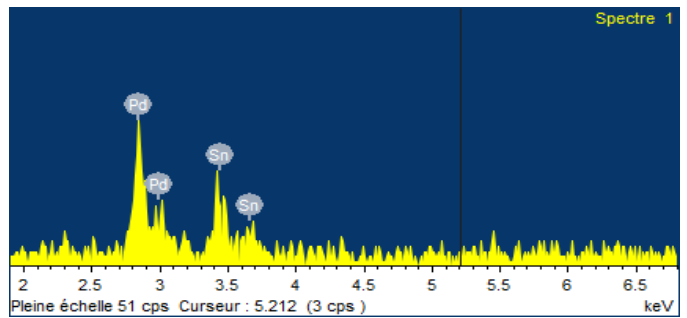

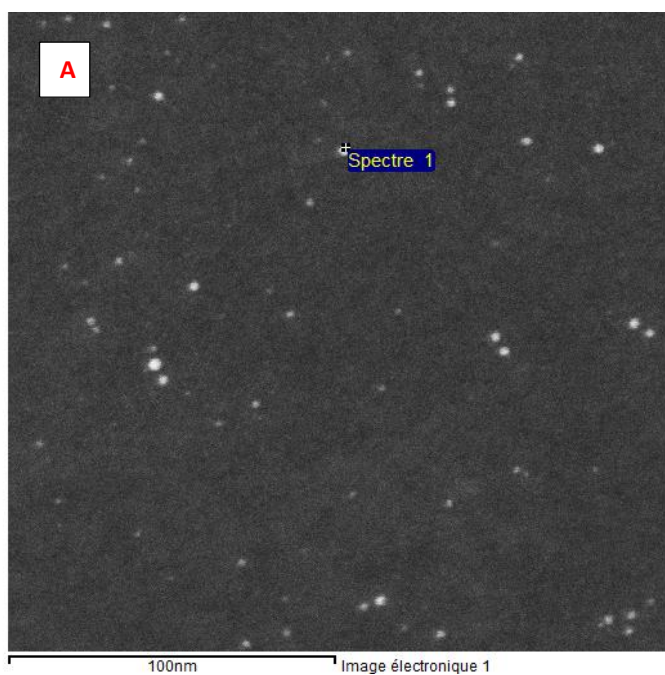

| Element | %Mass  | %Atomic |
|---------|--------|---------|
| Pd L    | 64.54  | 67.00   |
| Sn L    | 35.46  | 33.00   |
| Total   | 100.00 |         |

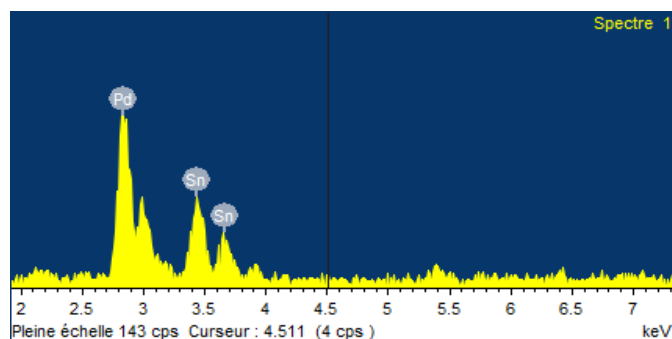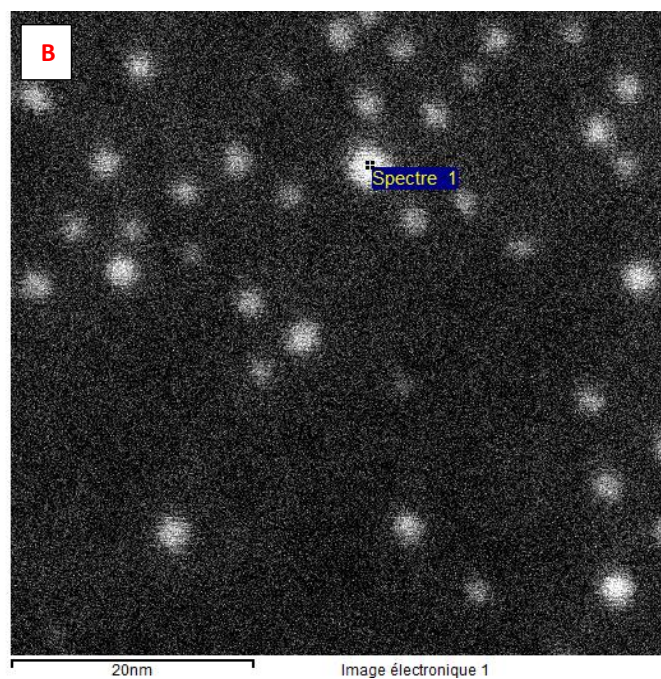

| Element | %Mass  | %Atomic |
|---------|--------|---------|
| Pd L    | 96.99  | 89.48   |
| Si K    | 3.01   | 10.52   |
| Total   | 100.00 |         |

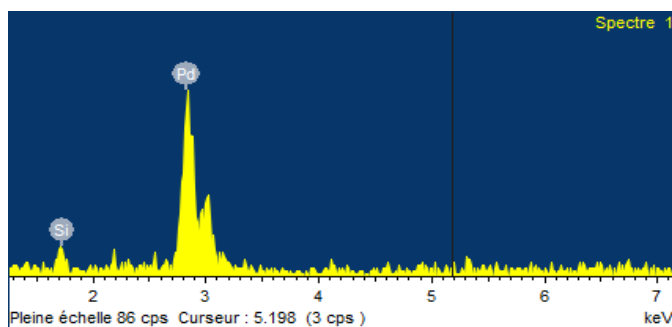

**Figure S5** – **A**) STEM-HAADF-EDS of the palladium-tin nanoparticles (on a copper grid with a carbon lacey) synthesized at room temperature with 2 equiv. of tin precursor under 4 bars of H<sub>2</sub> in THF - **B**) STEM-HAADF-EDS of the palladium nanoparticles (on a copper grid with a carbon lacey) synthesized at room temperature with 2 equiv. of silane under 4 bars of H<sub>2</sub> in THF.



## Crystalline phase determination

|                       |     | Experimental   | Theoretical hexagonal Pd |
|-----------------------|-----|----------------|--------------------------|
| <b>D (nm) (h,k,l)</b> | N°1 | 0.241 (1,0,0)  | 0.241(1,0,0)             |
|                       | N°2 | 0.229 (0,1,1)  | 0.227 (0,1,1)            |
|                       | N°3 | 0.229 (-1,1,1) | 0.227 (-1,1,1)           |
| <b>Angle (°)</b>      | N°1 | 0              | 0                        |
|                       | N°2 | 60.7           | 61.8                     |
|                       | N°3 | 114.6          | 118.1                    |

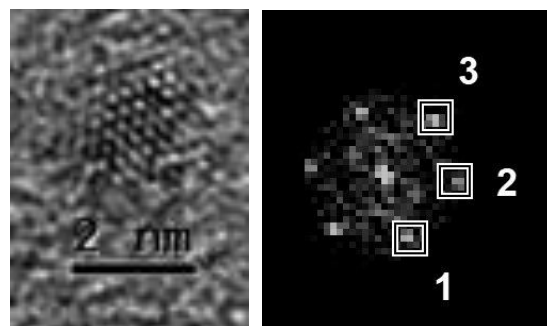

**Figure S6** – HRTEM of palladium nanoparticles (on a copper grid with a carbon lacey) synthesized at room temperature with 1.5 equiv. of silane under 4 bars of H<sub>2</sub> with the corresponding Fourier Transform and the attributed planes and angles, compared to hexagonal Pd structure from JCPDS file n°01-072-0710.

|                       |     | Experimental   | Theoretical Pd <sub>2</sub> Sn alloy |
|-----------------------|-----|----------------|--------------------------------------|
| <b>D (nm) (h,k,l)</b> | N°1 | 0.215 (0,2,0)  | 0.216 (0,2,0)                        |
|                       | N°2 | 0.225 (2,1,1)  | 0.227 (2,1,1)                        |
|                       | N°3 | 0.231 (2,-1,1) | 0.227 (2,-1,1)                       |
|                       | N°4 | 0.133 (4,0,2)  | 0.133 (4,0,2)                        |
|                       | N°5 | 0.114 (4,-2,2) | 0.113 (4,-2,2)                       |
|                       | N°6 | 0.129 (2,-3,1) | 0.127 (2,-3,1)                       |
| <b>Angle (°)</b>      | N°1 | 0              | 0                                    |
|                       | N°2 | 58.3           | 58.2                                 |
|                       | N°3 | 120.6          | 121.8                                |
|                       | N°4 | 88.9           | 90                                   |
|                       | N°5 | 120.7          | 121.8                                |
|                       | N°6 | 151.0          | 151.7                                |

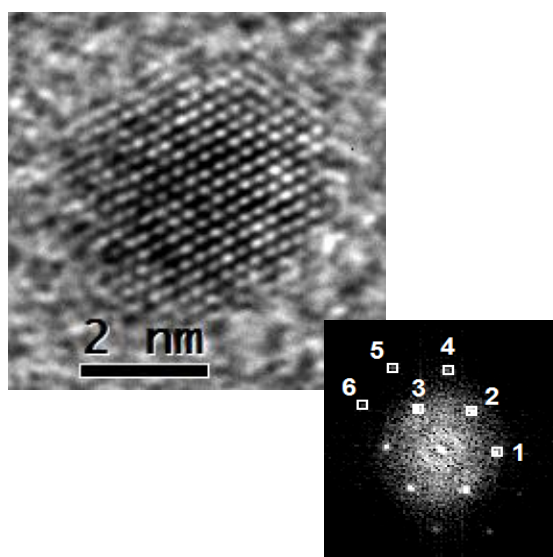

|                       |     | Experimental    | Theoretical Pd <sub>2</sub> Sn alloy |
|-----------------------|-----|-----------------|--------------------------------------|
| <b>D (nm) (h,k,l)</b> | N°1 | 0.218 (0,2,0)   | 0.216 (0,2,0)                        |
|                       | N°2 | 0.222 (2,1,1)   | 0.227 (2,1,1)                        |
|                       | N°3 | 0.241 (-2,1,-1) | 0.227 (-2,1,-1)                      |
| <b>Angle (°)</b>      | N°1 | 0               | 0                                    |
|                       | N°2 | 56.9            | 58.2                                 |
|                       | N°3 | 118.9           | 121.8                                |

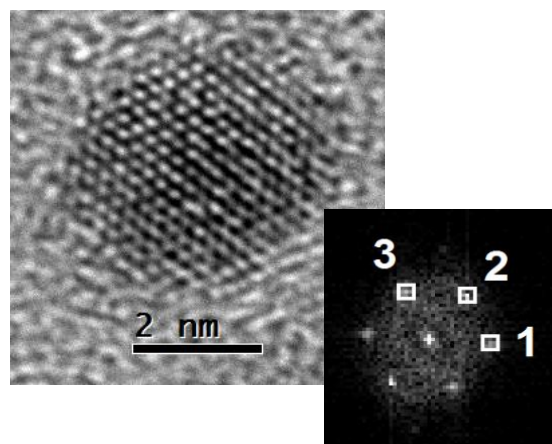

|                       |     | Experimental    | Theoretical<br>Pd <sub>2</sub> Sn alloy |
|-----------------------|-----|-----------------|-----------------------------------------|
| <b>D (nm) (h,k,l)</b> | N°1 | 0.224 (2,1,1)   | 0.227 (2,1,1)                           |
|                       | N°2 | 0.218 (0,2,0)   | 0.216 (0,2,0)                           |
|                       | N°3 | 0.224 (-2,1,-1) | 0.227 (-2,1,-1)                         |
| <b>Angle (°)</b>      | N°1 | 0               | 0                                       |
|                       | N°2 | 56.9            | 58.2                                    |
|                       | N°3 | 118.9           | 116.5                                   |

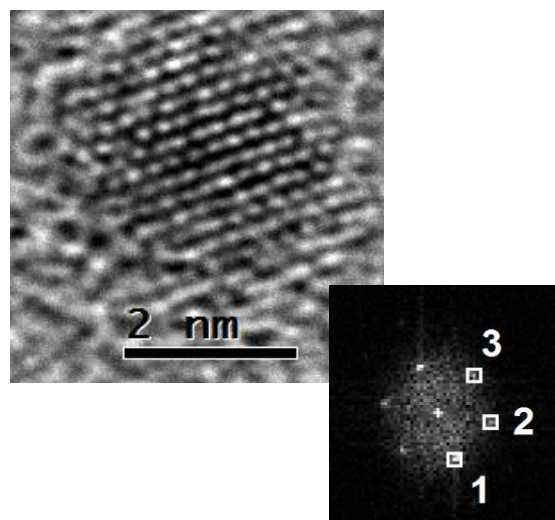

|                       |     | Experimental   | Theoretical<br>Pd <sub>2</sub> Sn alloy |
|-----------------------|-----|----------------|-----------------------------------------|
| <b>D (nm) (h,k,l)</b> | N°1 | 0.210 (0,2,0)  | 0.216 (0,2,0)                           |
|                       | N°2 | 0.229 (2,1,1)  | 0.227 (2,1,1)                           |
|                       | N°3 | 0.233 (2,-1,1) | 0.227 (2,-1,1)                          |
|                       | N°4 | 0.123 (2,3,1)  | 0.127 (2,3,1)                           |
|                       | N°5 | 0.140 (4,0,2)  | 0.133 (4,0,2)                           |
|                       | N°6 | 0.123 (2,-3,1) | 0.127 (2,-3,1)                          |
| <b>Angle (°)</b>      | N°1 | 0              | 0                                       |
|                       | N°2 | 54.6           | 58.2                                    |
|                       | N°3 | 123.6          | 121.8                                   |
|                       | N°4 | 25.7           | 28.3                                    |
|                       | N°5 | 89             | 90                                      |
|                       | N°6 | 153.7          | 151.7                                   |

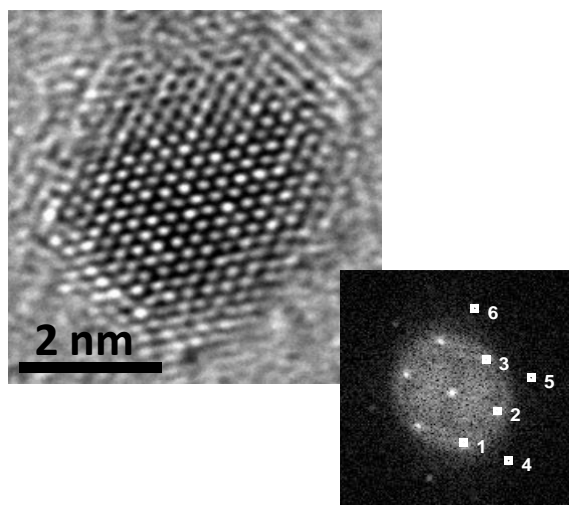

**Figure S7** – HRTEM of palladium-tin nanoparticles (on a copper grid with a carbon lacey) synthesized at room temperature with 2 equiv. of tin precursor under 4 bars of H<sub>2</sub> with the corresponding Fourier Transform and the attributed planes and angles compared to orthorhombic Pd<sub>2</sub>Sn structure from JCPDS file n°04-004-2280.

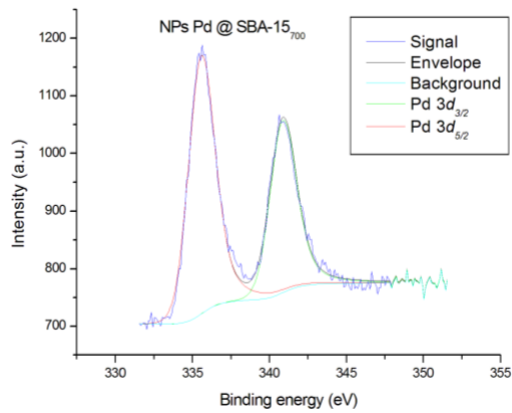

**Figure S8** – XPS spectrum and deconvolution of Pd 3d core levels of Pd colloid impregnated on a SBA-15<sub>700</sub> support.

**Catalytic study**

**NMR study**

The cross-coupling product (4-acetylbiphenyl) was isolated and analyzed by <sup>1</sup>H NMR (300 MHz, CDCl<sub>3</sub>): δ 8.06-8.02 (m, 2H), 7.72-7.67 (m, 2H), 7.66-7.62 (m, 2H), 7.61—7.45 (m, 2H), 7.44-7.40 (m, 1H), 2.64 (s, 3H), and <sup>13</sup>C NMR (75 MHz, CDCl<sub>3</sub>): δ 197.9, 146.0, 140.1, 136.0, 129.1, 129.0, 128.4, 127.4, 127.3, 26.8. These data are in full agreement with literature.<sup>1-3</sup>

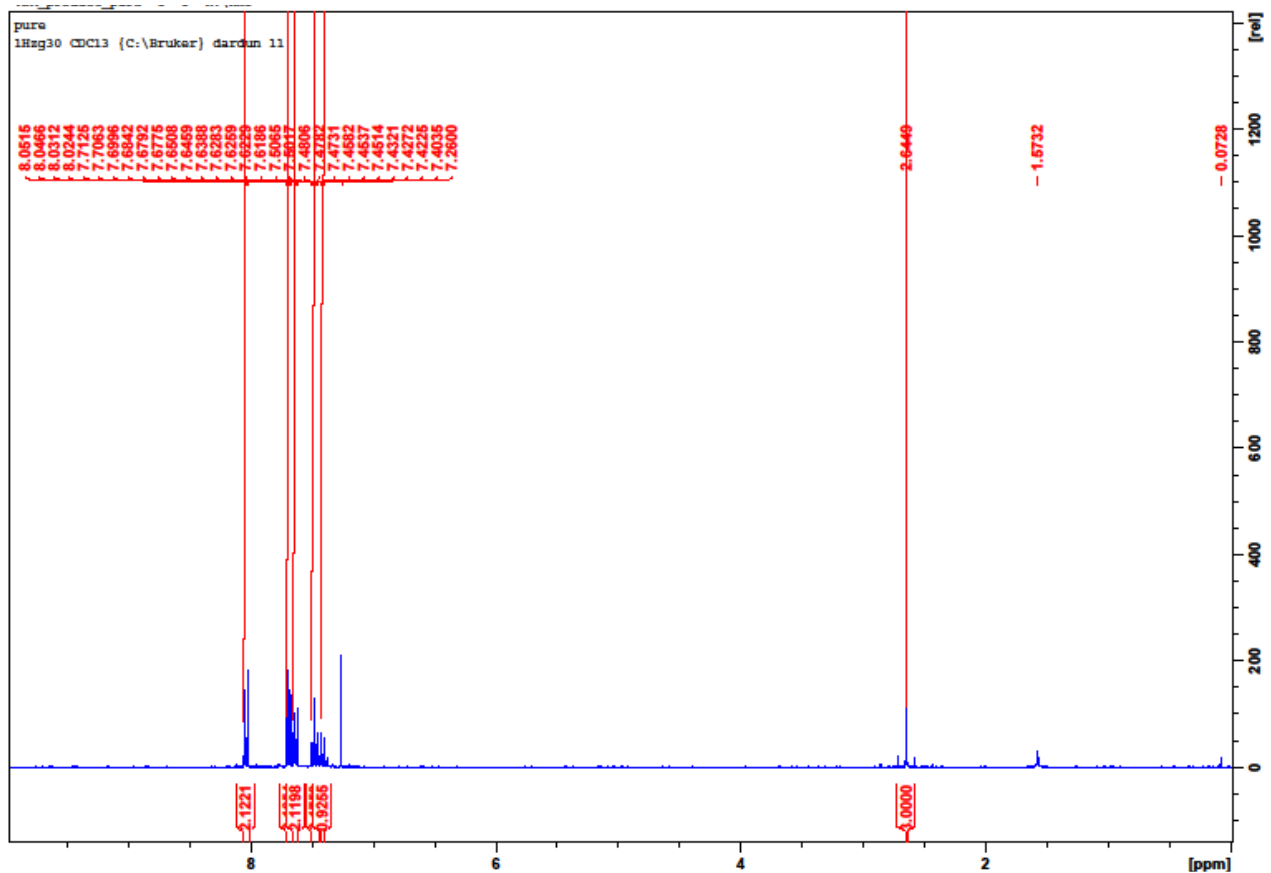

**Figure S9** – <sup>1</sup>H NMR spectrum (300 MHz, CDCl<sub>3</sub>) of the cross-coupling product (4-Acetylbiphenyl).

## Chromatogram

A representative chromatogram is given in Figure S10, where the retention time and response factor are mentioned. All the reagents were bought and used to do a calibration curve prior to any kinetic measurements. *n*-Dodecane was used as internal standard.

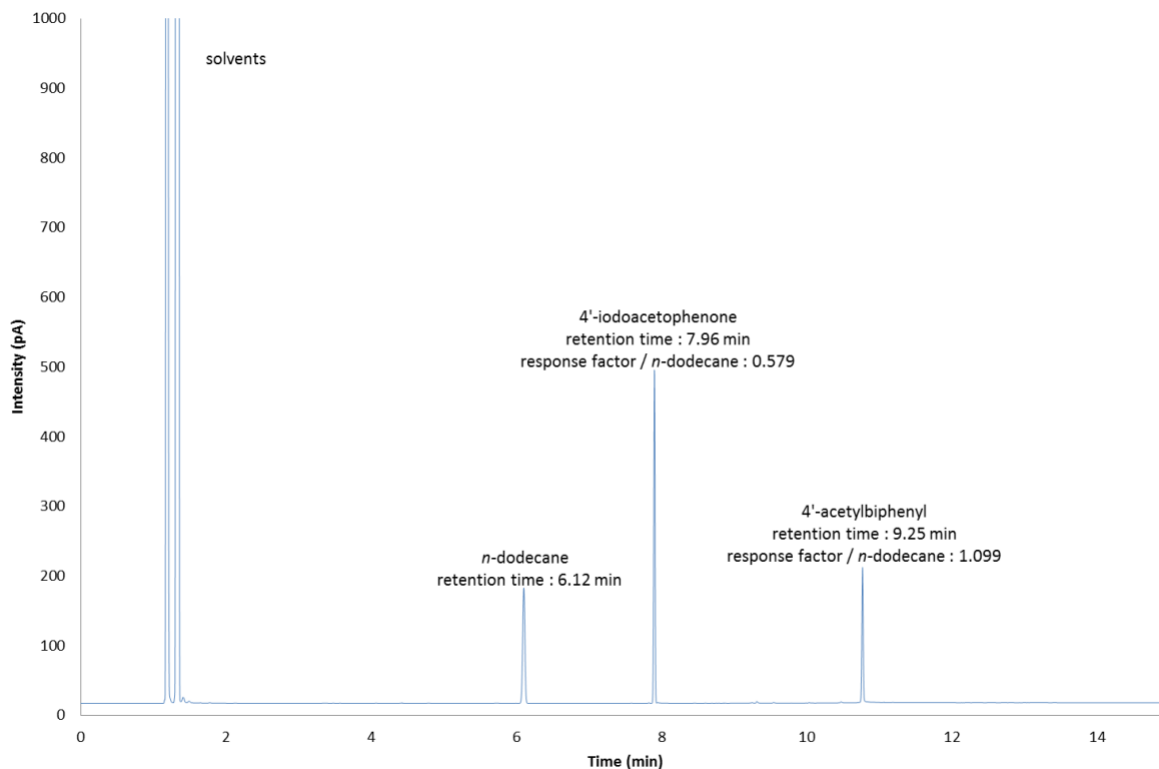

**Figure S10 – Representative chromatogram obtained to measure the conversions and yields.**

## TON and TOF assessment

The productivity (TON) was measured using the formula:  $\frac{\text{amount of converted reactant (mmol)}}{\text{amount of total palladium (mmol)}}$ . For example, as 0.2 mol% is used and a complete conversion is achieved, the TON is 500.

The activity (TOF<sub>50</sub>) was measured using the formula:  $\frac{TON}{\text{time (h)}}$ , and it was measured at ca. 50 % conversion (slope to the curve).

## Catalytic tests

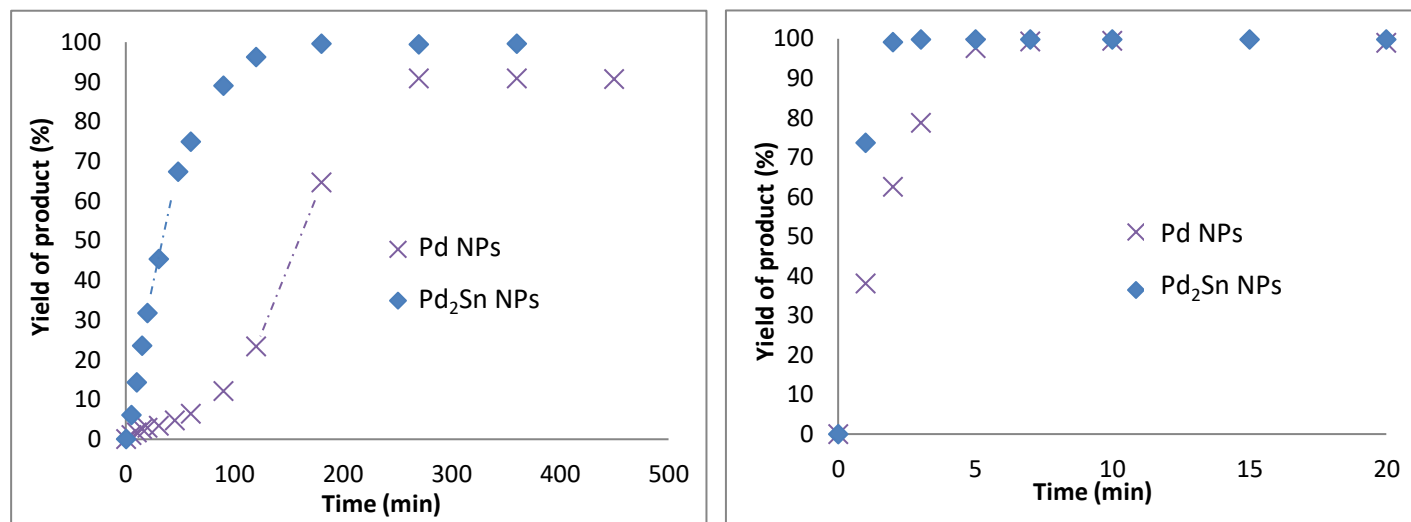

**Figure S11** – Kinetic monitoring of the Suzuki-Miyaura cross-coupling reaction using Pd and Pd<sub>2</sub>Sn colloidal catalysts at  $2 \cdot 10^{-3}$  mol % (left) and 0.2 mol% (right) of total Pd. The slopes of the conversion/product yields vs. time at ca. 50 % conversion and shown here as blue and purple dash lines were used to calculate TOF<sub>50</sub>.

The same procedure was used to compare the Pd NPs synthesized in THF or toluene. Despite the discrepancy at 1 minute due to a slightly different addition time of the catalyst, the activities of both catalysts are very similar measured between 1 and 3 minutes.

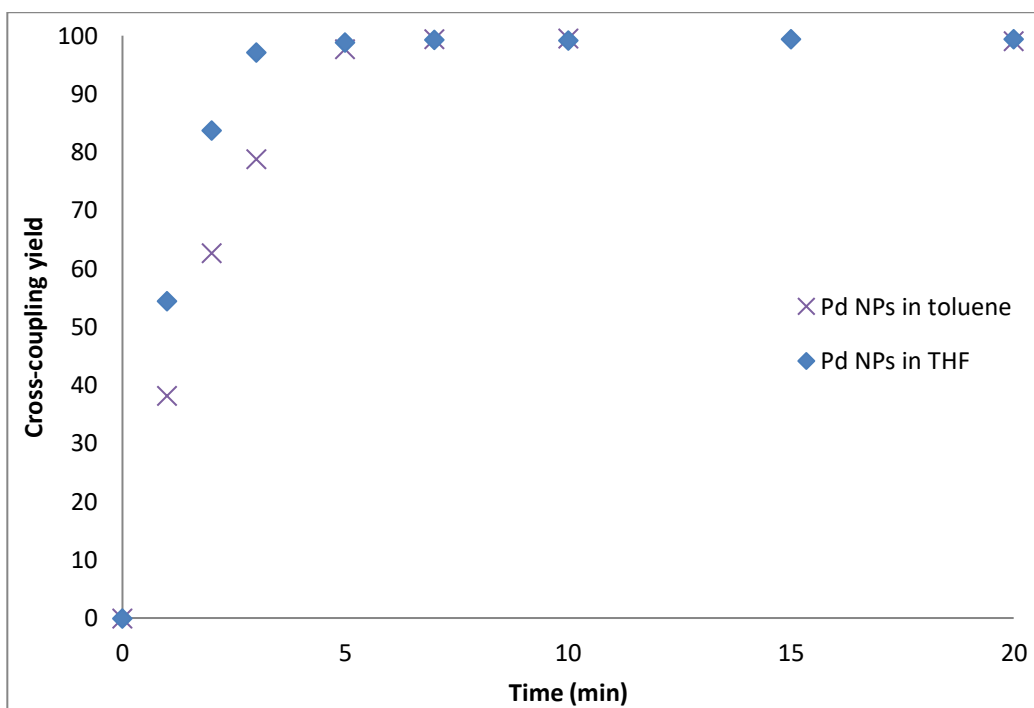

**Figure S12** – Kinetic monitoring of the Suzuki-Miyaura cross-coupling reaction using Pd NPs in toluene or THF at 0.2 mol% of total Pd.

## References

- 1 C. Nájera, J. Gil-Moltó, S. Karlström and L. R. Falvello, *Org. Lett.*, 2003, **5**, 1451–1454.
- 2 J. H. Li and W. J. Liu, *Org. Lett.*, 2004, **6**, 2809–2811.
- 3 H. Firouzabadi, N. Iranpoor, M. Gholinejad and F. Kazemi, *RSC Adv.*, 2011, **1**, 1013–1019.
